# Supplementary material for: Identification and verification of prognostic genes related to zinc homeostasis and zinc transport in breast cancer
Source: PeerJ journal article supplement (doi:10.7717/peerj.20031), 2025-09-30
Supplement: code_translation_StaffER.docx [file code_translation_StaffER.docx]

r.00_rawdata

“raw_count_data2 <- 2^raw_count_data1 - 1 # 去log”

“# 去log” means “logarithmic transformation”
