# Supplementary material for: Identification and verification of prognostic genes related to zinc homeostasis and zinc transport in breast cancer
Source: PeerJ journal article supplement (doi:10.7717/peerj.20031), 2025-09-30
Supplement: MIQE_checklist.xlsx [file MIQE_checklist.xlsx]

## Sheet: Sheet1
ITEM TO CHECK	IMPORTANCE	CHECKLIST
EXPERIMENTAL DESIGN
Definition of experimental and control groups	E	Line 187-199
Number within each group	E	Line 187-199
Assay carried out by core lab or investigator's lab?	D	Investigator's lab
Acknowledgement of authors' contributions	D	Author information
SAMPLE
Description	E	Line 187-199
Volume/mass of sample processed	D	Cell:0.5 x 105-1 X 106cells, depending on the cell line；Tissue 15mg
Microdissection or macrodissection	E	macrodissection
Processing procedure	E	RNA frozen at -80℃ immediately after isolation
If frozen - how and how quickly?	E	RNA frozen at -80℃ immediately after isolation
If fixed - with what, how quickly?	E	RNA frozen at -80℃ immediately after isolation
Sample storage conditions and duration (especially for FFPE samples)	E	Frozen at -80℃ immediately after processing
NUCLEIC ACID EXTRACTION
Procedure and/or instrumentation	E	Line 200-210
Name of kit and details of any modifications	E	Line 200-210
Source of additional reagents used	D	N/A
Details of DNase or RNAse treatment	E	RNA resuspended in DEPC-treated water and reverse transcriptase reactions were treated with RNAse; no DNase treatment
Contamination assessment (DNA or RNA)	E	Done by OD 260/280 determination;also no reverse transcriptase control done for qPCR
Nucleic acid quantification	E	Nano-drop RNA extract
Instrument and method	E	Nano-drop RNA extract
Purity (A260/A280)	D	Approximately 2.0 for each sample
Yield	D	0.5-3 ug/ul
RNA integrity method/instrument	E	Yes
RIN/RQI or Cq of 3' and 5' transcripts	E	Cq
Electrophoresis traces	D	N/A
Inhibition testing (Cq dilutions, spike or other)	E	Cq dilutions
REVERSE TRANSCRIPTION
Complete reaction conditions	E	Line 200-210
Amount of RNA and reaction volume	E	Line 200-210
Priming oligonucleotide (if using GSP) and concentration	E	Line 200-210
Reverse transcriptase and concentration	E	Line 200-210
Temperature and time	E	Line 200-210
Manufacturer of reagents and catalogue numbers	D	Line 200-210
Cqs with and without RT	D*	Line 200-210
Storage conditions of cDNA	D	Stored at -20℃ in RNAse-free water
qPCR TARGET INFORMATION
If multiplex, efficiency and LOD of each assay.	E	No
Sequence accession number	E	NCBI database
Location of amplicon	D	N/A
Amplicon length	E	100~300bp
In silico specificity screen (BLAST, etc)	E	Yes, BLAST and UCSC Browser analysis performed
Pseudogenes, retropseudogenes or other homologs?	D	N/A
Sequence alignment	D	N/A
Secondary structure analysis of amplicon	D	N/A
Location of each primer by exon or intron (if applicable)	E	Line 200-210
What splice variants are targeted?	E	Line 200-210
qPCR OLIGONUCLEOTIDES
Primer sequences	E	Line 200-210
RTPrimerDB Identification Number	D	N/A
Probe sequences	D**	N/A
Location and identity of any modifications	E	NO
Manufacturer of oligonucleotides	D	Line 200-210
Purification method	D	PAGE,by manufacturer (TsingKe Biotech)
qPCR PROTOCOL
Complete reaction conditions	E	Line 200-210
Reaction volume and amount of cDNA/DNA	E	Line 200-210
Primer, (probe), Mg++ and dNTP concentrations	E	Line 200-210
Polymerase identity and concentration	E	Line 200-210
Buffer/kit identity and manufacturer	E	Line 200-210
Exact chemical constitution of the buffer	D	Line 200-210
Additives (SYBR Green I, DMSO, etc.)	E	Line 200-210
Manufacturer of plates/tubes and catalog number	D	Line 200-210
Complete thermocycling parameters	E	Line 200-210
Reaction setup (manual/robotic)	D	Line 200-210
Manufacturer of qPCR instrument	E	Line 200-210
qPCR VALIDATION
Evidence of optimisation (from gradients)	D	N/A
Specificity (gel, sequence, melt, or digest)	E	Line 200-210
For SYBR Green I, Cq of the NTC	E	Line 200-210
Standard curves with slope and y-intercept	E	Line 200-210
PCR efficiency calculated from slope	E	Line 200-210
Confidence interval for PCR efficiency or standard error	D	Standard error
r2 of standard curve	E	Line 200-210
Linear dynamic range	E	Yes
Cq variation at lower limit	E	Line 200-210
Confidence intervals throughout range	D	N/A
Evidence for limit of detection	E	Line 200-210
If multiplex, efficiency and LOD of each assay.	E	Line 200-210
DATA ANALYSIS
qPCR analysis program (source, version)	E	Microsoft Excel version 12.3.4
Cq method determination	E	Determined and analyzed by sequence detection software (SDS 2.2, ABI)
Outlier identification and disposition	E	Line 200-210
Results of NTCs	E	Line 200-210
Justification of number and choice of reference genes	E	Line 200-210
Description of normalisation method	E	Line 200-210
Number and concordance of biological replicates	D	2
Number and stage (RT or qPCR) of technical replicates	E	3
Repeatability (intra-assay variation)	E	< 1.5%
Reproducibility (inter-assay variation, %CV)	D	N/A
Power analysis	D	N/A
Statistical methods for result significance	E	Paired T test;ANOVA
Software (source, version)	E	Graphpad Pism version 9.5.0
Cq or raw data submission using RDML	D	N/A
Table 1. MIQE checklist for authors, reviewers and editors. All essential information (E) must be submitted with the manuscript. Desirable
information (D) should be submitted if available. If using primers obtained from RTPrimerDB, information on qPCR target, oligonucleotides,
protocols and validation is available from that source.
*: Assessing the absence of DNA using a no RT assay is essential when first extracting RNA. Once the sample has been validated as
RDNA-free, inclusion of a no-RT control is desirable, but no longer essential.
**: Disclosure of the probe sequence is highly desirable and strongly encouraged. However, since not all commercial pre-designed assay
vendors provide this information, it cannot be an essential requirement. Use of such assays is advised against.
