# Supplementary material for: Identification and verification of prognostic genes related to zinc homeostasis and zinc transport in breast cancer
Source: PeerJ journal article supplement (doi:10.7717/peerj.20031), 2025-09-30
Supplement: Raw_data.xlsx [file Raw_data.xlsx]

## Sheet: Cell
Sample	Target	CT	Dye
7	TBP	18.98	SYBR
7	TBP	18.99	SYBR
7	TBP	18.98	SYBR
149	TBP	21.62	SYBR
149	TBP	21.59	SYBR
149	TBP	21.6	SYBR
159	TBP	20.28	SYBR
159	TBP	20.3	SYBR
159	TBP	20.31	SYBR
231	TBP	19.81	SYBR
231	TBP	19.79	SYBR
231	TBP	19.76	SYBR
474	TBP	22.01	SYBR
474	TBP	21.98	SYBR
474	TBP	22.1	SYBR
10A	TBP	23.83	SYBR
10A	TBP	23.84	SYBR
10A	TBP	23.8	SYBR
T47D	TBP	18.85	SYBR
T47D	TBP	18.7	SYBR
T47D	TBP	18.87	SYBR
7	PCSK6	22.54	SYBR
7	PCSK6	22.5	SYBR
7	PCSK6	22.41	SYBR
149	PCSK6	23.58	SYBR
149	PCSK6	23.55	SYBR
149	PCSK6	23.6	SYBR
159	PCSK6	22.55	SYBR
159	PCSK6	22.49	SYBR
159	PCSK6	22.53	SYBR
231	PCSK6	31.9	SYBR
231	PCSK6	31.93	SYBR
231	PCSK6	31.95	SYBR
474	PCSK6	26.31	SYBR
474	PCSK6	26.33	SYBR
474	PCSK6	26.3	SYBR
10A	PCSK6	28.4	SYBR
10A	PCSK6	28.36	SYBR
10A	PCSK6	28.28	SYBR
T47D	PCSK6	22.72	SYBR
T47D	PCSK6	22.7	SYBR
T47D	PCSK6	22.74	SYBR
7	TPRG1	25.87	SYBR
7	TPRG1	25.85	SYBR
7	TPRG1	25.87	SYBR
149	TPRG1	28.36	SYBR
149	TPRG1	28.37	SYBR
149	TPRG1	28.39	SYBR
159	TPRG1	23.84	SYBR
159	TPRG1	23.81	SYBR
159	TPRG1	23.82	SYBR
231	TPRG1	26.78	SYBR
231	TPRG1	26.76	SYBR
231	TPRG1	26.81	SYBR
474	TPRG1	28.84	SYBR
474	TPRG1	28.89	SYBR
474	TPRG1	28.86	SYBR
10A	TPRG1	30.74	SYBR
10A	TPRG1	30.76	SYBR
10A	TPRG1	30.8	SYBR
T47D	TPRG1	21.61	SYBR
T47D	TPRG1	21.59	SYBR
T47D	TPRG1	21.59	SYBR
7	TFF1	20.51	SYBR
7	TFF1	20.54	SYBR
7	TFF1	20.55	SYBR
149	TFF1	32.18	SYBR
149	TFF1	32.13	SYBR
149	TFF1	31.99	SYBR
159	TFF1	31.41	SYBR
159	TFF1	31.5	SYBR
159	TFF1	31.46	SYBR
231	TFF1	27.4	SYBR
231	TFF1	27.39	SYBR
231	TFF1	27.36	SYBR
474	TFF1	23.84	SYBR
474	TFF1	23.8	SYBR
474	TFF1	23.86	SYBR
10A	TFF1	33.4	SYBR
10A	TFF1	33.49	SYBR
10A	TFF1	33.45	SYBR
T47D	TFF1	22.89	SYBR
T47D	TFF1	22.91	SYBR
T47D	TFF1	22.88	SYBR
7	RSPH1	20.51	SYBR
7	RSPH1	20.46	SYBR
7	RSPH1	20.5	SYBR
149	RSPH1	31.1	SYBR
149	RSPH1	30.97	SYBR
149	RSPH1	30.99	SYBR
159	RSPH1	29.28	SYBR
159	RSPH1	29.35	SYBR
159	RSPH1	29.41	SYBR
231	RSPH1	27.3	SYBR
231	RSPH1	27.35	SYBR
231	RSPH1	27.27	SYBR
474	RSPH1	26.71	SYBR
474	RSPH1	26.73	SYBR
474	RSPH1	26.71	SYBR
10A	RSPH1	31.46	SYBR
10A	RSPH1	31.43	SYBR
10A	RSPH1	31.42	SYBR
T47D	RSPH1	22.82	SYBR
T47D	RSPH1	22.8	SYBR
T47D	RSPH1	22.87	SYBR
7	EIF4E3	20.89	SYBR
7	EIF4E3	20.88	SYBR
7	EIF4E3	20.9	SYBR
149	EIF4E3	24.46	SYBR
149	EIF4E3	24.55	SYBR
149	EIF4E3	24.48	SYBR
159	EIF4E3	21.38	SYBR
159	EIF4E3	21.36	SYBR
159	EIF4E3	21.34	SYBR
231	EIF4E3	24.28	SYBR
231	EIF4E3	24.3	SYBR
231	EIF4E3	24.31	SYBR
474	EIF4E3	22.83	SYBR
474	EIF4E3	22.8	SYBR
474	EIF4E3	22.85	SYBR
10A	EIF4E3	24.79	SYBR
10A	EIF4E3	24.81	SYBR
10A	EIF4E3	24.8	SYBR
T47D	EIF4E3	20.84	SYBR
T47D	EIF4E3	20.8	SYBR
T47D	EIF4E3	20.79	SYBR
7	CLIC6	28.79	SYBR
7	CLIC6	28.77	SYBR
7	CLIC6	28.8	SYBR
149	CLIC6	33.8	SYBR
149	CLIC6	33.82	SYBR
149	CLIC6	33.79	SYBR
159	CLIC6	33.87	SYBR
159	CLIC6	33.9	SYBR
159	CLIC6	33.83	SYBR
231	CLIC6	22.36	SYBR
231	CLIC6	22.39	SYBR
231	CLIC6	22.35	SYBR
474	CLIC6	31.77	SYBR
474	CLIC6	31.75	SYBR
474	CLIC6	31.71	SYBR
10A	CLIC6	34.49	SYBR
10A	CLIC6	34.5	SYBR
10A	CLIC6	34.52	SYBR
T47D	CLIC6	21.38	SYBR
T47D	CLIC6	21.35	SYBR
T47D	CLIC6	21.36	SYBR

## Sheet: Tissue
Sample	Target	CT	Dye
tumor	Actin	23.71	SYBR
tumor	Actin	20.4	SYBR
tumor	Actin	18.7	SYBR
tumor	Actin	25.23	SYBR
tumor	Actin	21.26	SYBR
tumor	Actin	19.45	SYBR
tumor	Actin	22.18	SYBR
tumor	Actin	29.77	SYBR
tumor	Actin	26.44	SYBR
tumor	Actin	20.07	SYBR
tumor	Actin	20.58	SYBR
para-tumor	Actin	25.33	SYBR
para-tumor	Actin	24.28	SYBR
para-tumor	Actin	25.44	SYBR
para-tumor	Actin	26.91	SYBR
para-tumor	Actin	25.15	SYBR
para-tumor	Actin	22.65	SYBR
para-tumor	Actin	26.01	SYBR
para-tumor	Actin	24.86	SYBR
para-tumor	Actin	25	SYBR
para-tumor	Actin	28.34	SYBR
para-tumor	Actin	24.09	SYBR
tumor	CLIC6	30.735	SYBR
tumor	CLIC6	26.64	SYBR
tumor	CLIC6	25.47	SYBR
tumor	CLIC6	34.16	SYBR
tumor	CLIC6	26.18	SYBR
tumor	CLIC6	27.76	SYBR
tumor	CLIC6	29.09	SYBR
tumor	CLIC6	35.915	SYBR
tumor	CLIC6	32.78	SYBR
tumor	CLIC6	24.39	SYBR
tumor	CLIC6	29.32	SYBR
para-tumor	CLIC6	33.27	SYBR
para-tumor	CLIC6	31.11	SYBR
para-tumor	CLIC6	34	SYBR
para-tumor	CLIC6	36.29	SYBR
para-tumor	CLIC6	32.59	SYBR
para-tumor	CLIC6	31.55	SYBR
para-tumor	CLIC6	34.455	SYBR
para-tumor	CLIC6	31.71	SYBR
para-tumor	CLIC6	32.41	SYBR
para-tumor	CLIC6	34.12	SYBR
para-tumor	CLIC6	32.55	SYBR
tumor	EIF4E3	28.64	SYBR
tumor	EIF4E3	26.67	SYBR
tumor	EIF4E3	25.8	SYBR
tumor	EIF4E3	31.16	SYBR
tumor	EIF4E3	26.49	SYBR
tumor	EIF4E3	26.41	SYBR
tumor	EIF4E3	27.17	SYBR
tumor	EIF4E3	34.95	SYBR
tumor	EIF4E3	32.45	SYBR
tumor	EIF4E3	26.82	SYBR
tumor	EIF4E3	25.56	SYBR
para-tumor	EIF4E3	30.18	SYBR
para-tumor	EIF4E3	29.88	SYBR
para-tumor	EIF4E3	29.75	SYBR
para-tumor	EIF4E3	31.48	SYBR
para-tumor	EIF4E3	29.07	SYBR
para-tumor	EIF4E3	27.59	SYBR
para-tumor	EIF4E3	30.29	SYBR
para-tumor	EIF4E3	29.74	SYBR
para-tumor	EIF4E3	29.41	SYBR
para-tumor	EIF4E3	31.98	SYBR
para-tumor	EIF4E3	28.06	SYBR
tumor	TFF1	23.75	SYBR
tumor	TFF1	24.86	SYBR
tumor	TFF1	23.41	SYBR
tumor	TFF1	28.24	SYBR
tumor	TFF1	22.14	SYBR
tumor	TFF1	24.4	SYBR
tumor	TFF1	22.23	SYBR
tumor	TFF1	34.2	SYBR
tumor	TFF1	29.35	SYBR
tumor	TFF1	22.9	SYBR
tumor	TFF1	23.36	SYBR
para-tumor	TFF1	26.03	SYBR
para-tumor	TFF1	29.58	SYBR
para-tumor	TFF1	30.63	SYBR
para-tumor	TFF1	30.6	SYBR
para-tumor	TFF1	26.83	SYBR
para-tumor	TFF1	28.06	SYBR
para-tumor	TFF1	27.43	SYBR
para-tumor	TFF1	29.51	SYBR
para-tumor	TFF1	28.03	SYBR
para-tumor	TFF1	31.27	SYBR
para-tumor	TFF1	27.6	SYBR
tumor	TPRG1	25.34	SYBR
tumor	TPRG1	23.21	SYBR
tumor	TPRG1	22.86	SYBR
tumor	TPRG1	27.62	SYBR
tumor	TPRG1	22.52	SYBR
tumor	TPRG1	24.56	SYBR
tumor	TPRG1	25.87	SYBR
tumor	TPRG1	31.3	SYBR
tumor	TPRG1	29.71	SYBR
tumor	TPRG1	22.37	SYBR
tumor	TPRG1	24.41	SYBR
para-tumor	TPRG1	27.35	SYBR
para-tumor	TPRG1	27.26	SYBR
para-tumor	TPRG1	29.87	SYBR
para-tumor	TPRG1	29.35	SYBR
para-tumor	TPRG1	27.43	SYBR
para-tumor	TPRG1	28.04	SYBR
para-tumor	TPRG1	30.61	SYBR
para-tumor	TPRG1	26.93	SYBR
para-tumor	TPRG1	29.19	SYBR
para-tumor	TPRG1	30.74	SYBR
para-tumor	TPRG1	28.91	SYBR
tumor	RSPH1	31.84	SYBR
tumor	RSPH1	29.22	SYBR
tumor	RSPH1	27.77	SYBR
tumor	RSPH1	33.04	SYBR
tumor	RSPH1	29.12	SYBR
tumor	RSPH1	28.22	SYBR
tumor	RSPH1	30.45	SYBR
tumor	RSPH1	36.86	SYBR
tumor	RSPH1	36.08	SYBR
tumor	RSPH1	27.59	SYBR
tumor	RSPH1	29.76	SYBR
para-tumor	RSPH1	34.32	SYBR
para-tumor	RSPH1	35.55	SYBR
para-tumor	RSPH1	34.65	SYBR
para-tumor	RSPH1	35.15	SYBR
para-tumor	RSPH1	33.4	SYBR
para-tumor	RSPH1	32.31	SYBR
para-tumor	RSPH1	34.89	SYBR
para-tumor	RSPH1	34.52	SYBR
para-tumor	RSPH1	36.23	SYBR
para-tumor	RSPH1	36.75	SYBR
para-tumor	RSPH1	33.44	SYBR
tumor	PCSK6	27.96	SYBR
tumor	PCSK6	24.2	SYBR
tumor	PCSK6	25.78	SYBR
tumor	PCSK6	28.51	SYBR
tumor	PCSK6	25.49	SYBR
tumor	PCSK6	24.63	SYBR
tumor	PCSK6	25.82	SYBR
tumor	PCSK6	31.7	SYBR
tumor	PCSK6	30.62	SYBR
tumor	PCSK6	24.55	SYBR
tumor	PCSK6	26.58	SYBR
para-tumor	PCSK6	31.4	SYBR
para-tumor	PCSK6	29.12	SYBR
para-tumor	PCSK6	33.49	SYBR
para-tumor	PCSK6	30.68	SYBR
para-tumor	PCSK6	30.27	SYBR
para-tumor	PCSK6	28.27	SYBR
para-tumor	PCSK6	31.54	SYBR
para-tumor	PCSK6	28.63	SYBR
para-tumor	PCSK6	30.48	SYBR
para-tumor	PCSK6	34.07	SYBR
para-tumor	PCSK6	30.54	SYBR
